# Supplementary material
Source: publisher figshare collection journal article supplement (https://aacr.figshare.com/articles/dataset/_/22473173)
Supplement: Supplementary file 1 [file 39924665]

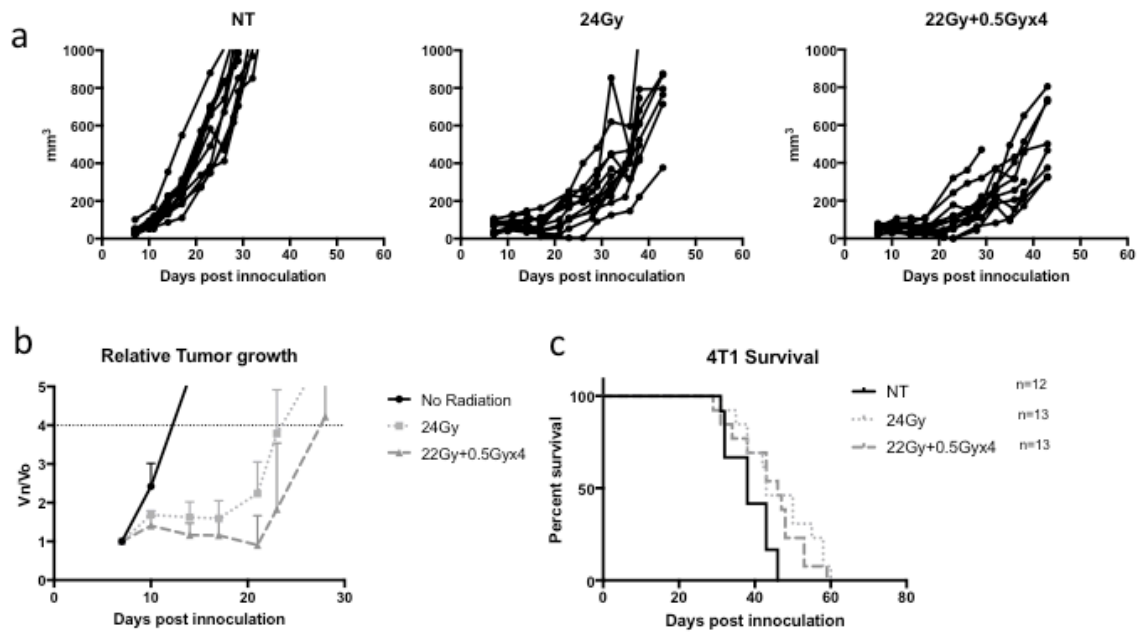

**Supplementary Figure2. Local PAM slightly delays tumor progression in 4T1 tumor bearing mice.**

a) Tumor measurements for mice bearing orthotopic 4T1 tumors, treated with local PAM and controls. b) Relative tumor growth of 4T1 tumor bearing mice with local PAM. c) Survival curves of 4T1 mice treated with local PAM. n=12-13 mice all panels
